# Supplementary material
Source: PubMed Central journal article supplement (PMC3031476)
Supplement: blood-2010-06-291716_1.pdf [file blood-2010-06-291716_1.pdf]

**Table S1. Primers for qRT-PCR**

| <b>Gene</b>                        | <b>Forward (5'-3')</b>   | <b>Reverse (5'-3')</b>  |
|------------------------------------|--------------------------|-------------------------|
| <b>Angptl3</b>                     | ACAGAGCAAAGGGACAGCTC     | TGGAGCATCATTTTGGATGA    |
| <b>HoxA9</b>                       | TGGTTCTCCTCCAGTTGATAG    | AGAAACTCCTTCTCCAGTTCC   |
| <b>Mef2c</b>                       | AGATCTGACATCCGGTGCAG     | TCTTGTTTCAGGTTACCAGGTG  |
| <b>Meis1</b>                       | CAGGACTTACCATCCTTCAAGTG  | GCGCTCTGATGCCCATGTGC    |
| <b>Pbx3</b>                        | AGAGCCAAATTGACCCAGAT     | ATGGGACGCGTTCTACTCTG    |
| <b>PU.1</b>                        | CCCTCCATCGGATGACTTGGTTAC | GCTTCTCCATCAGACACCTCCAG |
| <b>GATA1</b>                       | CAGAACCGGCCTCTCATCC      | TAGTGCATTGGGTGCCTGC     |
| <b>C/EBP <math>\epsilon</math></b> | AAGAAGTCGGTGGACAAGAACAG  | GTTGCGTTGTTTGGCTTTATCTC |
| <b>FOG1</b>                        | CACCCTGTGCAGGAACCAGT     | GGGTTTCTCTCCGTCGCCG     |
| <b>GATA3</b>                       | AGAACCGGCCCTTATCAA       | AGTCGCGCAGGATGTCC       |
| <b>Ikaros</b>                      | CTTCCAGTGCAACCAGTGT      | GTGAGGCTTACCAACGGAGT    |
| <b>Hes1</b>                        | GAGGCTGCCAAGGTTTTTGG     | GCTGGTGTAGACCGGGATGA    |
| <b>Nestin</b>                      | CTTCCCTGATGATCCAACCT     | ACCTCTGTGGCTGCTTCTTT    |
| <b>SDF1</b>                        | CAAGGTCGTCGCCGTGCTG      | CGTTGGCTCTGGCGATGTGG    |
| <b>SCF</b>                         | GTCATTGTTGGCTACGAGATA    | AACACGAGGTCATCCACTATT   |
| <b>TPO</b>                         | TCCCAGGAATTTGTCTCAGG     | GATCGCTAGCTGCTCTGATG    |
| <b>Delta1</b>                      | CACTATGGACAGTTGCTTTGA    | TGGCTCATAGTAATCCAAGATA  |
| <b>Jagged1</b>                     | TGGTTGGCTGGGAAATTGA      | TGGACACCAGGGCACATTC     |
| <b>TGF-<math>\beta</math></b>      | CACCGGAGAAGAGCCCTGGATA   | TGCCGCACACAGCAGTTC      |
| <b>Wnt3a</b>                       | CACCACCGTCAGCAACAGCC     | AGGAGCGTGTCACTGCGAAAG   |
| <b><math>\beta</math>-actin</b>    | AGCCATGTACGTAGCCATCC     | CTCTCAGCTGTGGTGGTGAA    |

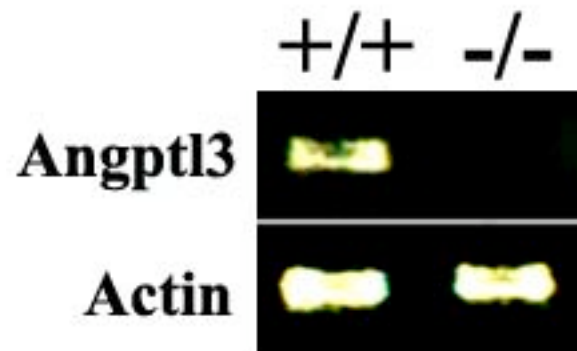

Figure S1. Angptl3-null mice do not express Angptl3 mRNA. Liver cells isolated from control (+/+) and Angptl3-null (-/-) mice were used for RT-PCR analysis to determine the level of expression of Angptl3 mRNA. Results are representative of three experiments.

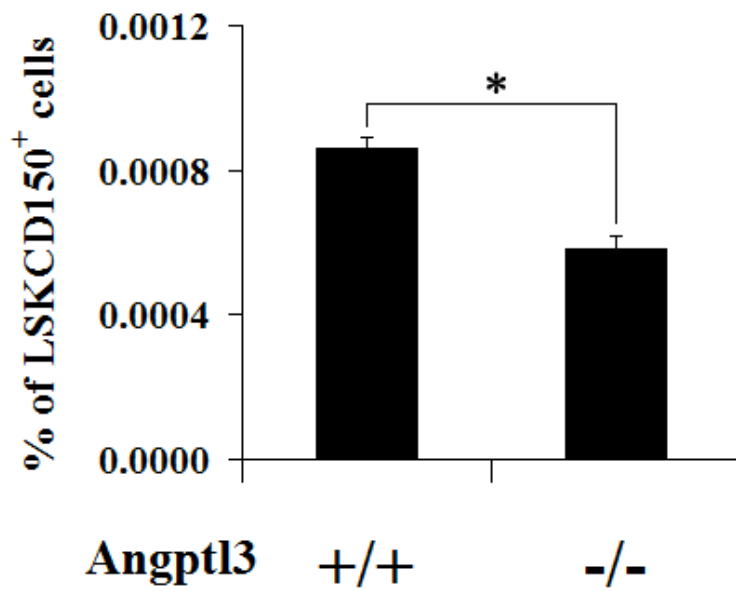

Figure S2. Decreased frequency of LT-HSCs in Angptl3-null mice. Shown are relative frequencies of LT-HSCs as Lin<sup>-</sup>Sca-1<sup>+</sup>Kit<sup>+</sup> CD150<sup>+</sup> cells in the BM of WT and Angptl3-null mice at 8-12 weeks (\*, p < 0.05, n = 4).

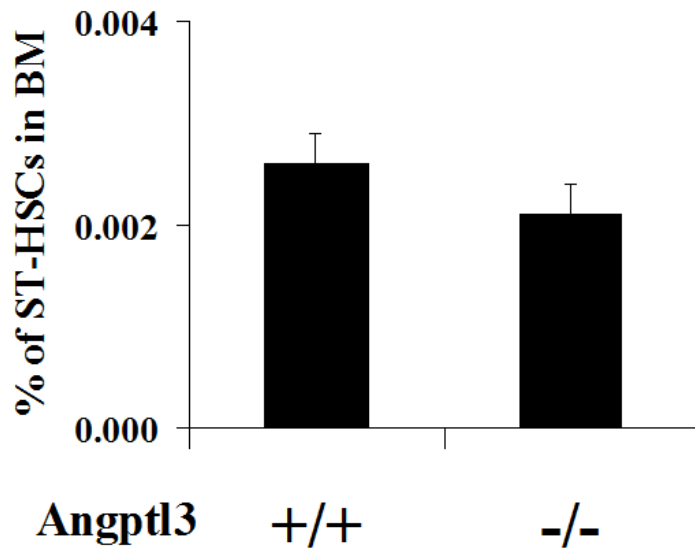

Figure S3. No significant difference of the frequencies of ST-HSCs in WT and Angptl3-null mice. Shown are relative frequencies of ST-HSCs as Lin<sup>-</sup>Sca-1<sup>+</sup>Kit<sup>+</sup>Fli2<sup>+</sup>CD34<sup>+</sup> cells in WT and Angptl3-null BM at 8-12 weeks (\*,  $p < 0.05$ ,  $n = 16$ ).

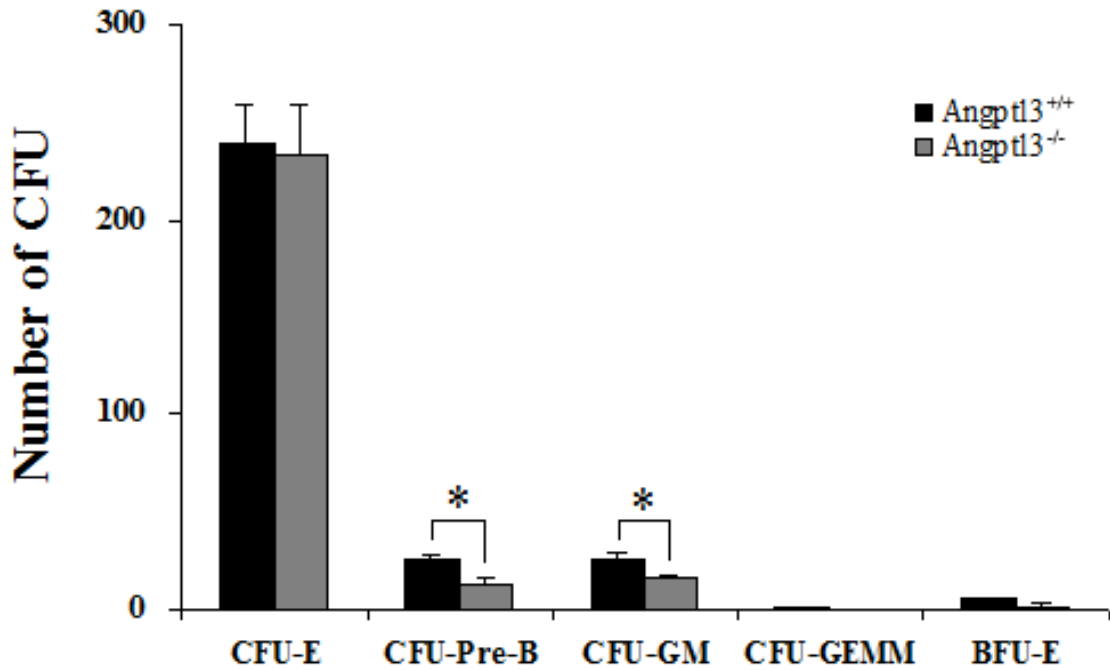

Figure S4. Myeloid progenitors and Pre-B progenitors, but not erythroid precursors, are decreased in Angpt13-null bone marrow compared to WT. Total BM cell populations were plated in methylcellulose medium M3434 (StemCell Technologies, Vancouver, Canada) for quantifying CFU-GM, CFU-GEMM, and BFU-E colonies, in M3630 for quantifying CFU-Pre-B colonies, and in M3334 for CFU-E colonies (n = 3).

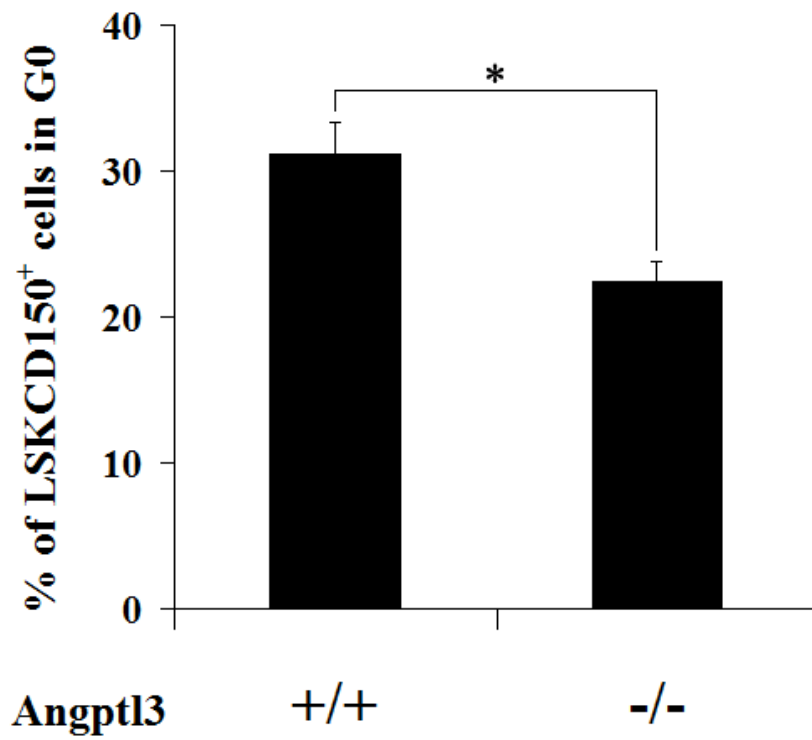

Figure S5 Angptl3-null BM HSCs are less quiescent than WT HSCs. LT-HSCs as Lin<sup>-</sup>Sca-1<sup>+</sup>Kit<sup>+</sup>CD150<sup>+</sup> cells stained with Hoechst 33342 and pyronin Y, were analyzed for cell cycle stage. The percentages of G0 cells for Angptl3-null and WT cells are shown (\*, p < 0.05, n = 4).

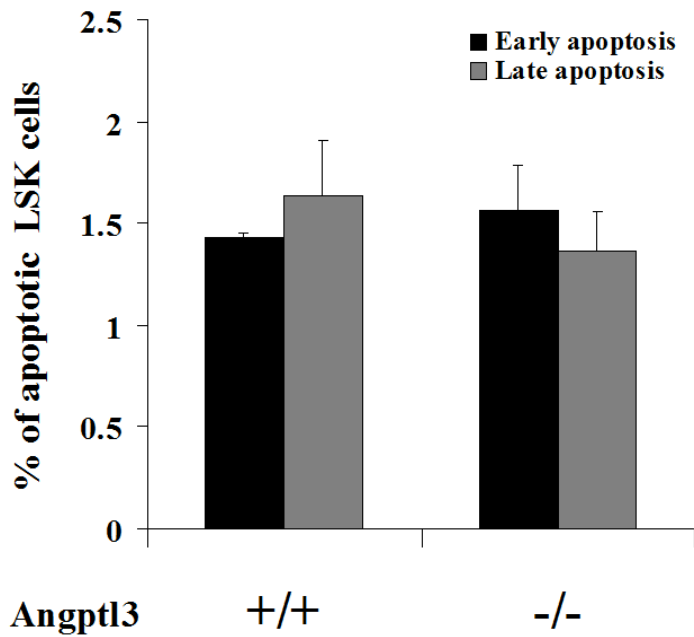

Fig. S6. WT and Angptl3-null HSCs have similar apoptotic status. WT or Angptl3-null BM Lin<sup>-</sup>Sca-1<sup>+</sup>Kit<sup>+</sup> cells were analyzed for apoptosis by using Annexin V and 7-AAD staining. Results showed there was no difference of early (Annexin V<sup>+</sup>/7-AAD<sup>-</sup>) or late apoptosis (Annexin V<sup>+</sup>/7-AAD<sup>+</sup>) between WT (+/+) and null (-/-) LSK cells (n = 4).

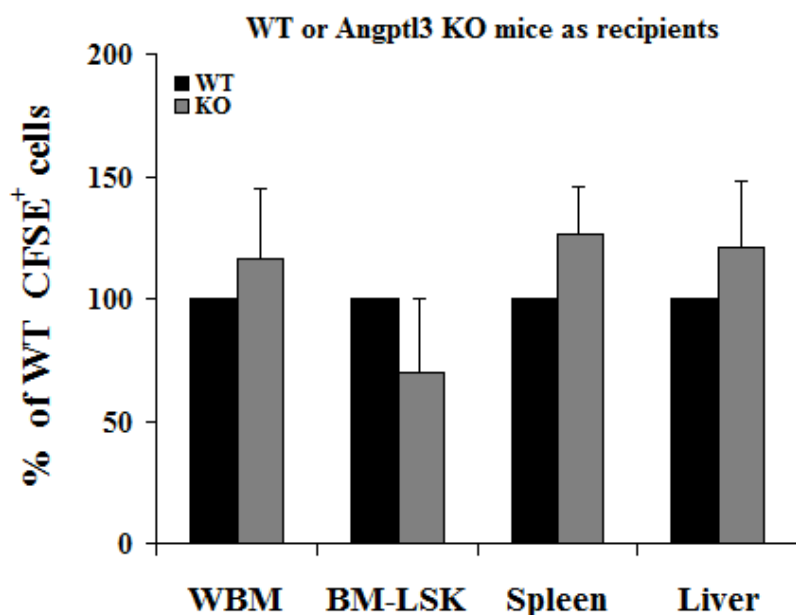

Figure S7. HSCs home equivalently to WT or to Angptl3-null recipient BM. BM from WT was labeled with 5-(and -6) carboxyfluorescein succinimidyl ester (CFSE), and  $1 \times 10^7$  cells were transplanted into lethally irradiated WT or Angptl3-null mice (KO). After 16 hours, the total percentage of CFSE<sup>+</sup> cells in the BM, spleen or liver or CFSE<sup>+</sup> LSK (CFSE<sup>+</sup>Lin<sup>-</sup>Sca-1<sup>+</sup>Kit<sup>+</sup>) cells in BM was determined by flow cytometry (n = 5).



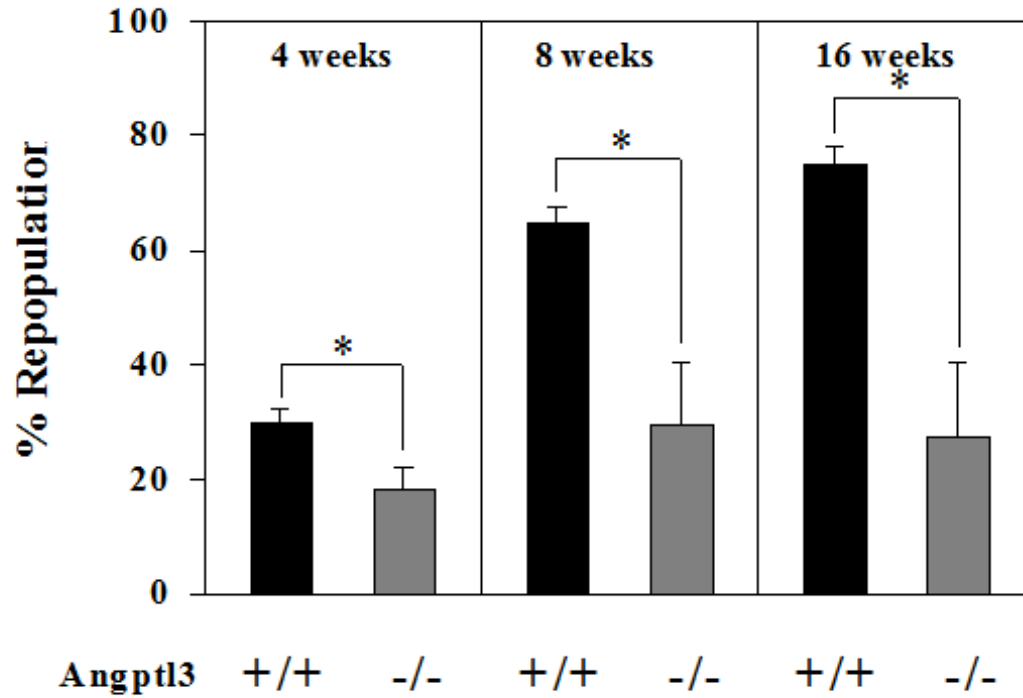

Figure S8. The deficiency of Angptl3 in HSCs results in decreased repopulation. WT or Angptl3-null donor CD45.2 Lin<sup>-</sup>Sca-1<sup>+</sup>Kit<sup>+</sup>Flk-2<sup>-</sup>CD34<sup>-</sup> cells (500 cells) were co-transplanted along with  $1.5 \times 10^5$  freshly isolated CD45.1 bone marrow competitors into lethally irradiated CD45.1 wild-type recipient mice. The engraftment at 4, 8, and 16 weeks post-transplant is shown (\*,  $p < 0.05$ .  $n = 5$ ).

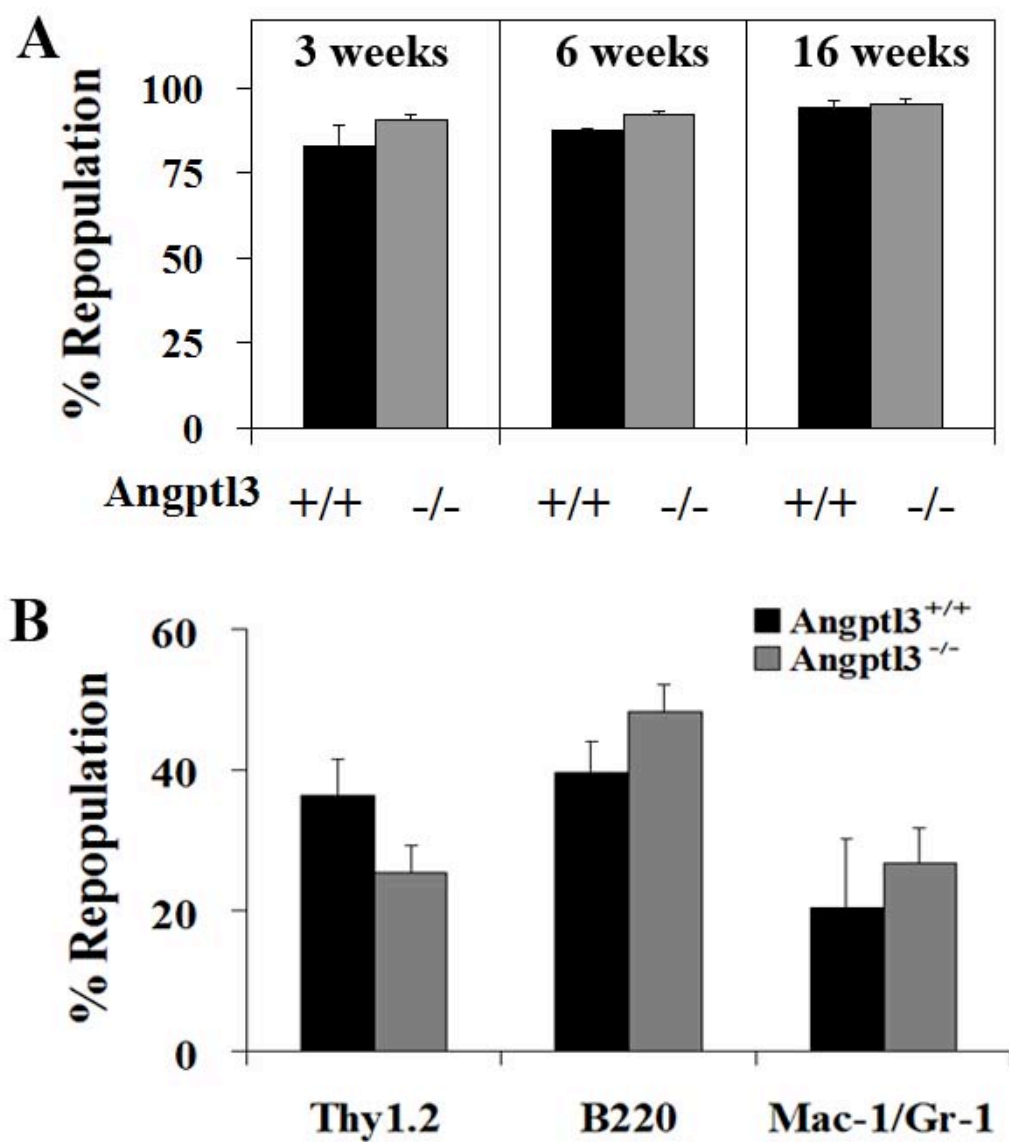

Fig. S9. Angptl3-null spleen cells have similar repopulation ability compared to WT counterparts. (A) Fifteen million of WT or Angptl3-null CD45.2 spleen cells were co-transplanted along with  $1.5 \times 10^5$  freshly isolated CD45.1 bone marrow competitors into lethally irradiated CD45.1 wild-type recipient mice. The engraftment at 3, 6, and 16 weeks post-transplant is shown ( $n = 4$ ). (B) Multilineage contribution of WT or Angptl3-null spleen cells in the transplanted recipients at 16 weeks post-transplant. The lineage contribution was shown as percentages of Thy1.2<sup>+</sup>, B220<sup>+</sup>, and Mac-1/Gr-1<sup>+</sup> cells in donor compartment.

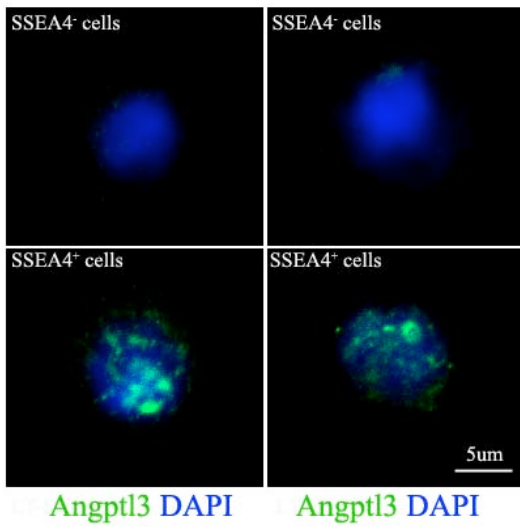

Figure S10. Angptl3 expression (green) in FACS-collected CD45<sup>-</sup>SSEA4<sup>-</sup> cells (top panel) was much lower than that in CD45<sup>-</sup>SSEA4<sup>+</sup> cells (bottom panel). Nuclei were counterstained with DAPI (blue). Scale bar applies to all the images.

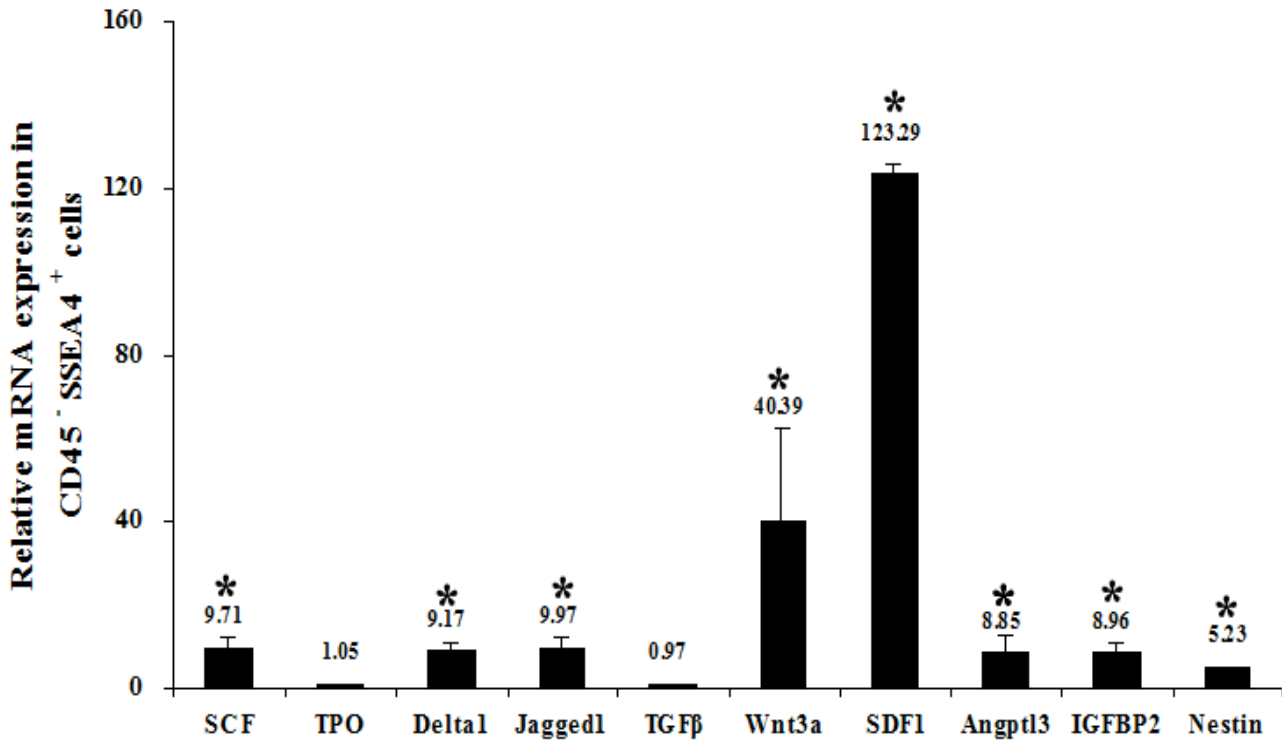

Fig. S11. Comparison of expression of cytokines in BM CD45<sup>-</sup>SSEA4<sup>+</sup> cells and in CD45<sup>+</sup>SSEA4<sup>-</sup> cells by real-time RT-PCR analysis. All listed mRNAs were expressed at significantly higher levels in SSEA4<sup>+</sup> cells than in SSEA4<sup>-</sup> cells with the exception of TPO and TGF-β.

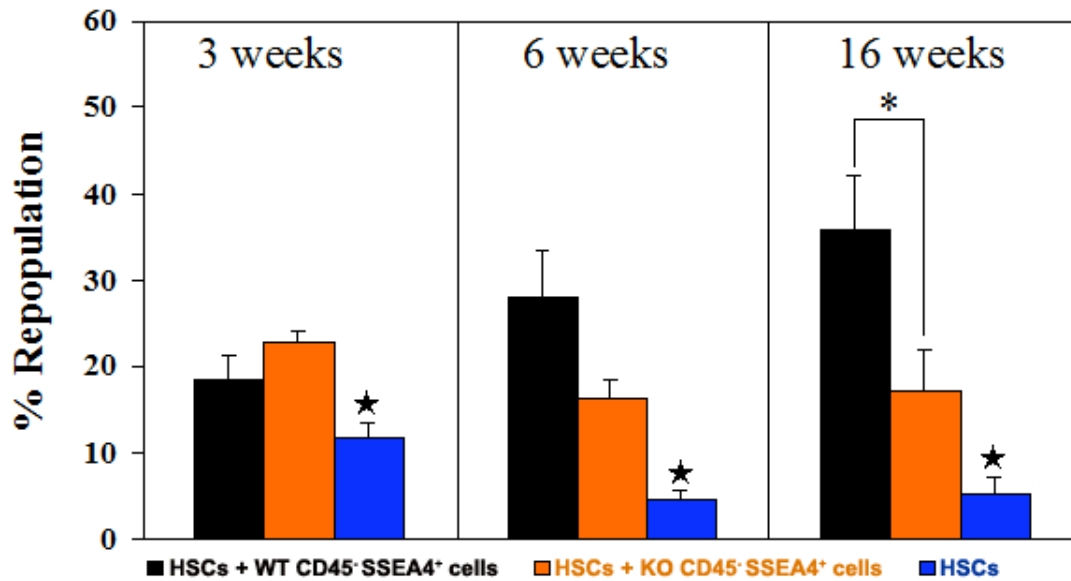

Figure S12. Angptl3-deficient BM CD45<sup>+</sup>SSEA4<sup>+</sup> cells have decreased ability to support expansion of HSCs. One hundred and fifty BM CD45.1<sup>+</sup>Lin<sup>-</sup>Sca-1<sup>+</sup>Kit<sup>+</sup>Flk-2<sup>-</sup>CD34<sup>-</sup> cells were cultured alone (blue bar), co-cultured with 450 CD45<sup>+</sup>SSEA4<sup>+</sup> BM cells isolated from CD45.2 WT mice (black bar), or co-cultured with the same number of CD45<sup>+</sup>SSEA4<sup>+</sup> cells from Angptl3-null mice (orange bar) in serum-containing StemSpan supplemented with SCF, TPO, and FGF1. After 5 days, the co-cultured cells were co-transplanted with  $1.5 \times 10^5$  CD45.2 competitors into lethally irradiated CD45.2 recipient mice. Shown is the engraftment at 3, 6, and 16 weeks post-transplant (\*, significantly different between two groups; ★, significantly different from co-cultured values.  $p < 0.05$ ,  $n = 5-7$ ).

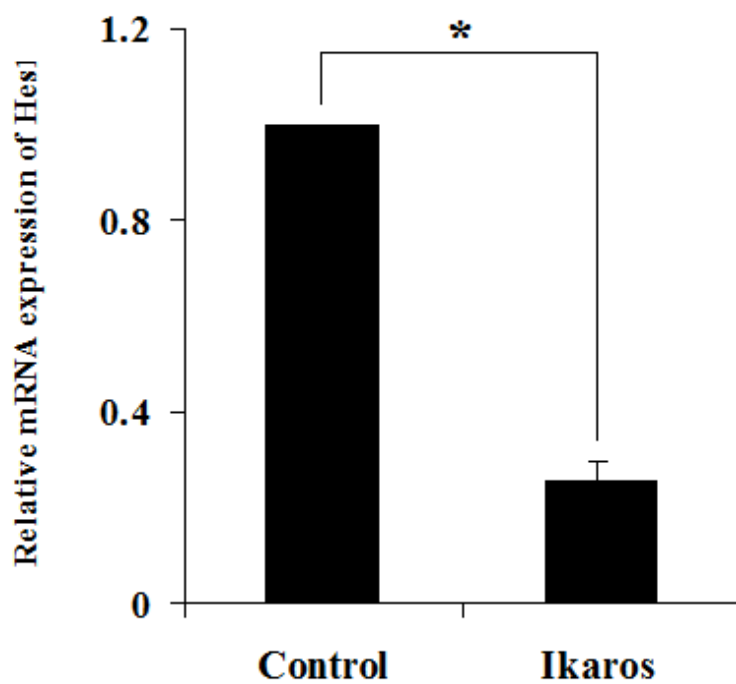

Fig. S13. Overexpression of Ikaros down-regulates Hes1 expression. Mouse E16 fetal liver Lin<sup>-</sup> cells were infected by retroviruses encoding GFP or Ikaros. The cells at day 3 post-infection were used for real-time RT-PCR analysis. The gene expression in GFP retrovirus infected cells was normalized to 1 (\*,  $p < 0.05$ ,  $n = 3$ ).
